# Supplementary material for: Telomere Length as a New Risk Marker of Early-Onset Colorectal Cancer
Source: MDPI journal article supplement (doi:10.3390/ijms24043526), 2023-02-09
Supplement: s1 [file s1]

# SUPPLEMENTARY INFORMATION

## Telomere Length as a New Risk Marker of Early-Onset Colorectal Cancer

Abel Martel-Martel, Luis A. Corchete, Marc Martí, Rosario Vidal-Tocino, Elena Hurtado, Edurne Álvaro, Fernando Jiménez, Marta Jiménez-Toscano, Francesc Balaguer, Gonzalo Sanz, Irene López, Sergio Hernández-Villafranca, Araceli Ballester, Alfredo Vivas, Sirio Melone, Carlos Pastor, Lorena Brandáriz, Manuel A. Gómez-Marcos, Juan J. Cruz-Hernández, José Perea \* and Rogelio González-Sarmiento \*

**Supplementary Table S1.** Early-Onset colorectal cancer cases clinical data and their impact on telomere length.

| Characteristic                            | Total (%)      | TL Mean (kb) | p-Value |
|-------------------------------------------|----------------|--------------|---------|
| <b>Total</b>                              | 87             |              |         |
| <b>Sex</b>                                |                |              |         |
| Female                                    | 36 (41)        | 136          | 0.140   |
| Male                                      | 51 (59)        | 114          |         |
| <b>Age at Diagnosis</b>                   |                |              |         |
| <29 years                                 | 4 (5)          | 220.6        | 0.096   |
| (30-39) years                             | 15 (17)        | 98           |         |
| (40-50) years                             | 68 (78)        | 122.1        |         |
| Mean (std), years                         | 42.7 (6.2)     |              |         |
| Median (range), years                     | 44 (23-49)     |              |         |
| <b>Body Mass Index (BMI)</b>              |                |              |         |
| Underweight (<18.5 kg/m <sup>2</sup> )    | 2 (2)          | 126          | 0.268   |
| Normoweight (18.5-<25 kg/m <sup>2</sup> ) | 33 (38)        | 149          |         |
| Overweight (25-<30 kg/m <sup>2</sup> )    | 24 (28)        | 106          |         |
| Obese (>30 kg/m <sup>2</sup> )            | 11 (13)        | 113          |         |
| Unknown                                   | 17 (19)        |              |         |
| Mean (std), kg/m <sup>2</sup>             | 25.15 (5.4)    |              |         |
| Median (range), kg/m <sup>2</sup> 3       | 24.9 (15.6-43) |              |         |
| <b>Tumor Stage at diagnosis</b>           |                |              |         |
| I                                         | 13 (15)        | 104          | 0.803   |
| II                                        | 18 (21)        | 122          |         |
| III                                       | 32 (37)        | 122          |         |
| IV                                        | 22 (23)        | 129          |         |
| <b>Tumor Site</b>                         |                |              |         |
| Right colon                               | 20 (23)        | 112          | 0.472   |
| Left colon                                | 27 (31)        | 134          |         |
| Rectosigmoid junction/Rectum              | 40 (46)        | 119          |         |
| <b>Histological features*</b>             |                |              |         |
| Mucinous                                  | 13/59 (22)     | 118/124      | 0.812   |
| "Signet ring" cells                       | 4/59 (7)       | 113/123      | 0.820   |
| Unknown                                   | 18 (21)        |              |         |
| <b>Grade of differentiation*</b>          |                |              |         |
| High                                      | 9 (10)         | 89           | 0.067   |
| Medium                                    | 23 (26)        | 117          |         |
| Low                                       | 27 (31)        | 138.3        |         |
| Unknown                                   | 18 (21)        |              |         |

|                                       |         |      |       |
|---------------------------------------|---------|------|-------|
| Multiple Primary Neoplasms            |         |      |       |
| Synchronous colorectal cancer         | 3 (3)   | 61.8 | 0.065 |
| Other Multiple Primary Neoplasms      | 8 (9)   | 125  | 0.584 |
| Familial History of Colorectal Cancer |         |      |       |
| Yes                                   | 19 (22) | 145  | 0.345 |
| No                                    | 60 (69) | 120  |       |
| Unknown                               | 8 (9)   |      |       |
| Sporadic cases                        |         |      |       |
| Yes                                   | 39 (45) | 113  | 0.126 |
| No                                    | 43 (49) | 136  |       |
| Unknown                               | 5 (6)   |      |       |

\* The remaining cases are those with only biopsy due to palliative conditions.
